# Supplementary figures and images for: Absence of a pancreatic microbiome in intraductal papillary mucinous neoplasm
Source: HighWire-hosted journal article supplement (doi:10.1136/gutjnl-2023-331012), 2024-03-01

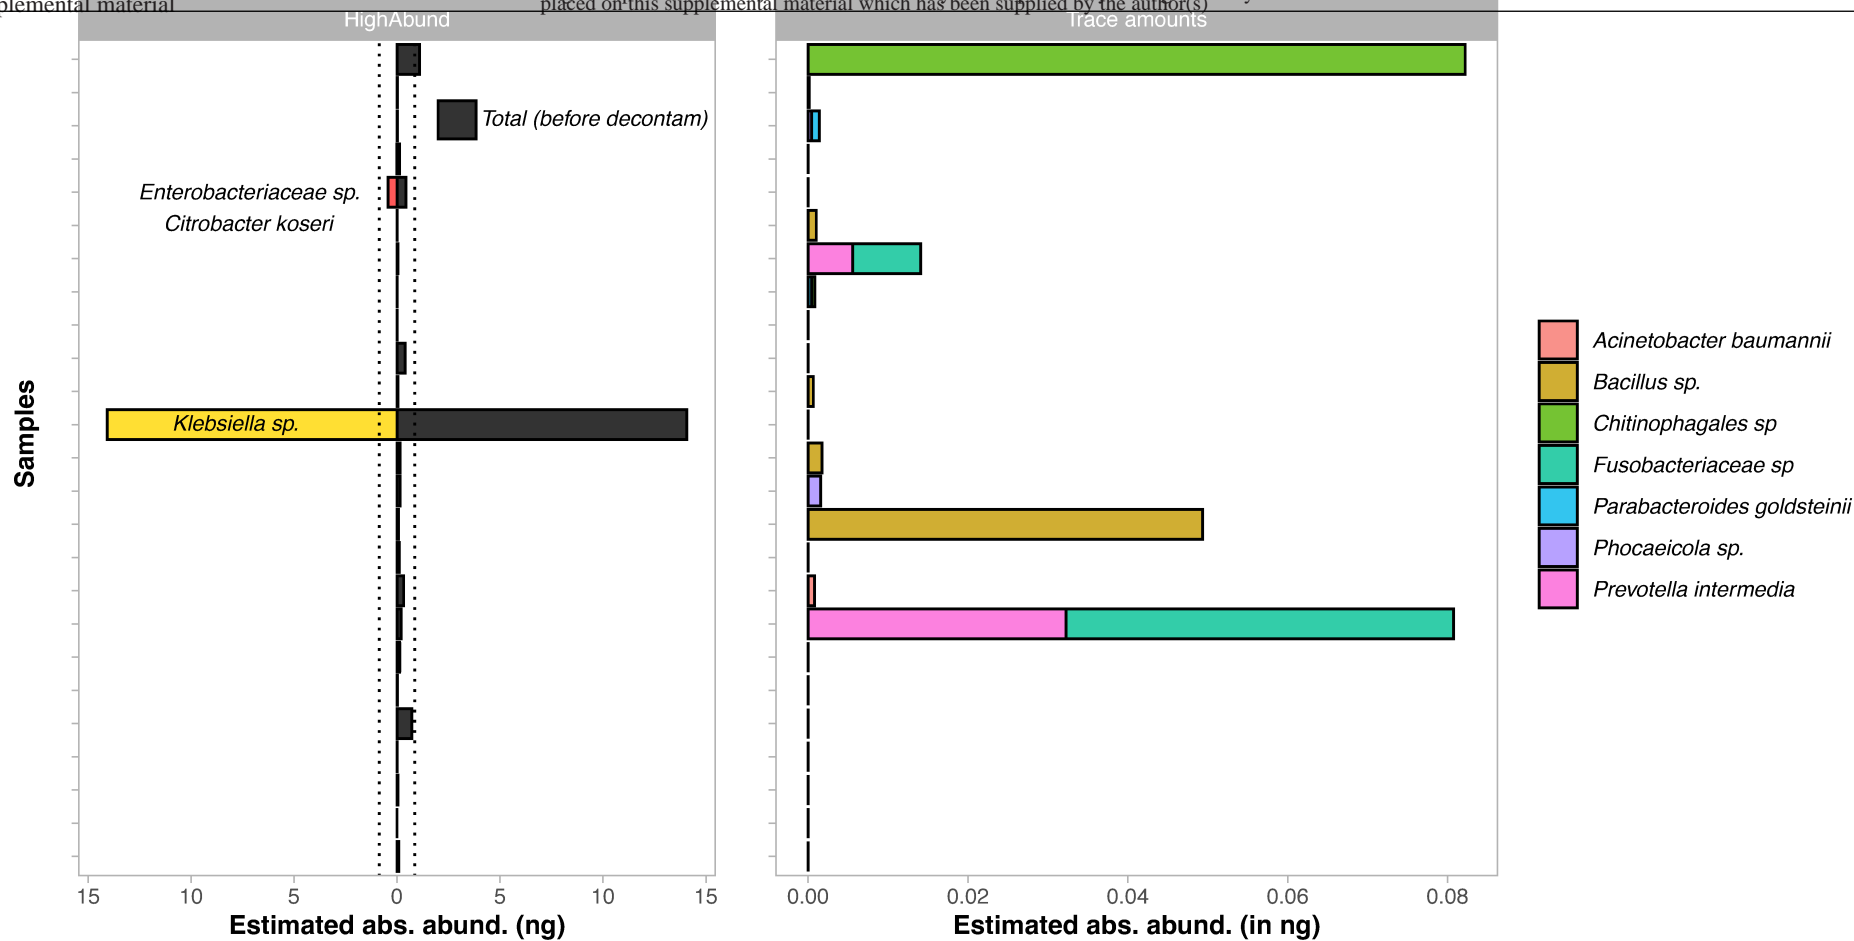

Supplement: gutjnl-2023-331012supp003_data_supplement.pdf [file gutjnl-2023-331012supp003_data_supplement.pdf]
